# Supplementary material for: White organic light-emitting diodes with extremely low turn-on voltage at 1.5 V
Source: Royal Society of Chemistry journal article supplement (doi:10.1039/d5tc02150b), 2025-01-01
Supplement: d5tc02150b1.pdf [file d5tc02150b1.pdf]

**Supporting Information for**

**White organic light-emitting diodes with extremely low turn-on voltage at 1.5 V**

Yang Yiyang<sup>1</sup>, Qing-Jun Shui<sup>1</sup>, Hiroto Iwasaki<sup>1</sup>, Daiki Nakahigashi<sup>1</sup>, Yutaka Majima<sup>1</sup>, Ken-ichi Nakayama<sup>2</sup>, Naoya Aizawa<sup>2,3,4</sup>, Seiichiro Izawa<sup>1\*</sup>

<sup>1</sup>Materials and Structures Laboratory, Institute of Science Tokyo, 4259 Nagatsuta-cho, Midori-ku, Yokohama, Kanagawa 226-8503, Japan.

<sup>2</sup>Division of Applied Chemistry, Graduate School of Engineering, Osaka University, 2-1 Yamadaoka, Suita, Osaka 565-0871, Japan.

<sup>3</sup>Center for Future Innovation, Graduate School of Engineering, Osaka University, 2-1 Yamadaoka, Suita, Osaka 565-0871, Japan.

<sup>4</sup>Institute for Chemical Reaction Design and Discovery (WPI-ICReDD), Hokkaido University, Sapporo, Hokkaido 001-0021, Japan

E-Mail: [izawa.s.ac@m.titech.ac.jp](mailto:izawa.s.ac@m.titech.ac.jp)

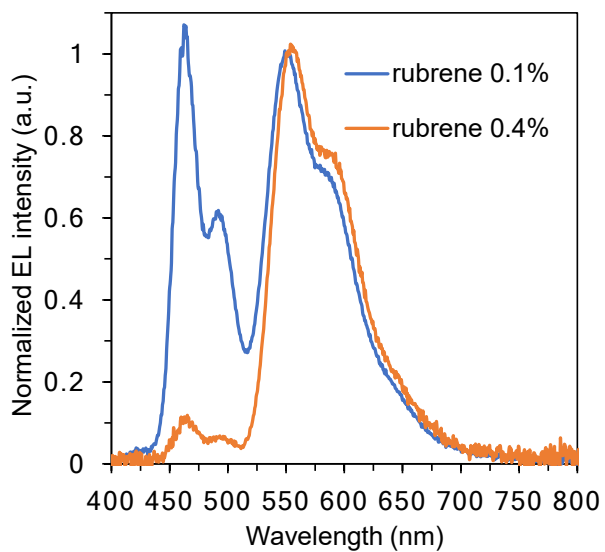

**Figure S1.** (a) Normalized EL emission spectra of the double-doped UC-OLED with 0.65% of TbPe and 0.1% of rubrene, and with 0.4% of TbPe and 0.4% of rubrene at 10 mA/cm<sup>2</sup>.

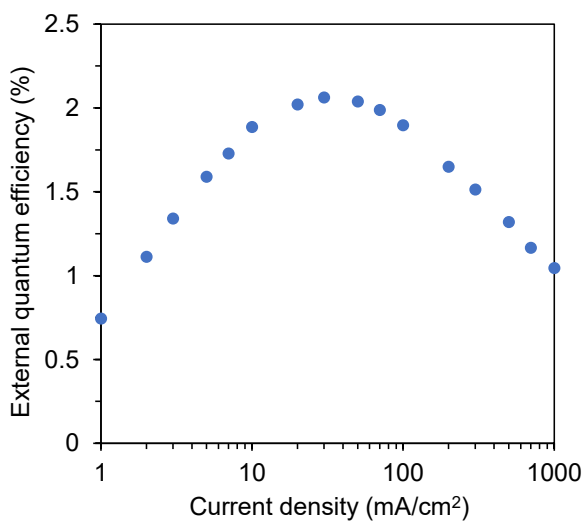

**Figure S2.** External quantum efficiency of the double-doped UC-OLED with 0.65% of TbPe and 0.1% of rubrene.

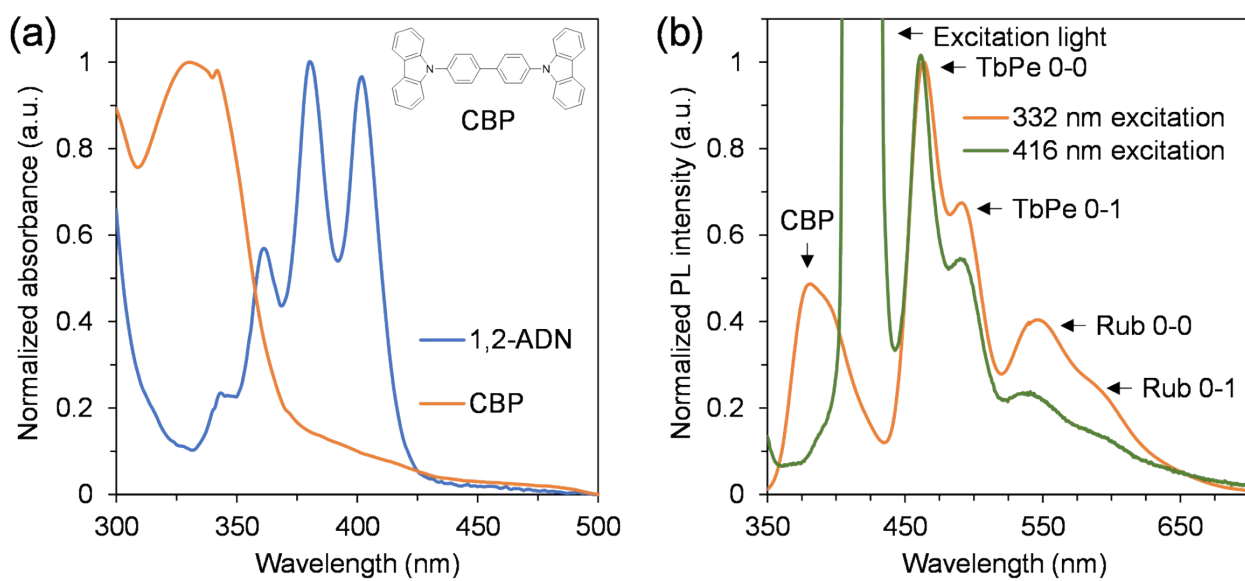

**Figure S3.** (a) Absorption spectra of 1,2-ADN and CBP in the thin film. Inset: Chemical structures of CBP. (b) PL spectra of CBP film doped with 0.65% of TbPe and 0.1% of rubrene excited by 332 nm and 416 nm.
